# Supplementary material for: Ruthenium imidazole oxime carbonyls and their activities as CO-releasing molecules
Source: Royal Society of Chemistry journal article supplement (doi:10.1039/c2dt31002c), 2012-01-01
Supplement: c2dt31002c.pdf [file c2dt31002c.pdf]

## Supplementary material

### Ruthenium imidazole oxime carbonyls and their activities as CO-releasing molecules

Larisa Oresmaa, Heli Tarvainen, Kalle Machal, Matti Haukka\*

Figures presenting the changes in the UV-Vis spectrum of myoglobin in concentration 60  $\mu\text{M}$ , 40  $\mu\text{M}$  and 20  $\mu\text{M}$ , formation of MbCO over time after addition of 60  $\mu\text{M}$ , 40  $\mu\text{M}$  and 20  $\mu\text{M}$  in DMSO to deoxymyoglobin solution.

|                         |         |
|-------------------------|---------|
| Complex 1 Figures 1-4   | S2-S3   |
| Complex 2 Figures 5-8   | S4-S5   |
| Complex 3 Figures 9-12  | S6-S7   |
| Complex 4 Figures 13-16 | S8-S9   |
| Complex 5 Figures 17-20 | S10-S11 |
| Complex 6 Figures 21-24 | S12-S13 |

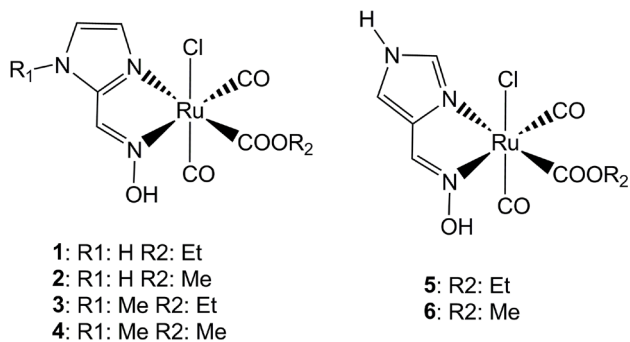

**Ru(imidazole-2-carbaldehyde oxime)(COOEt)(CO)<sub>2</sub>Cl (1)**

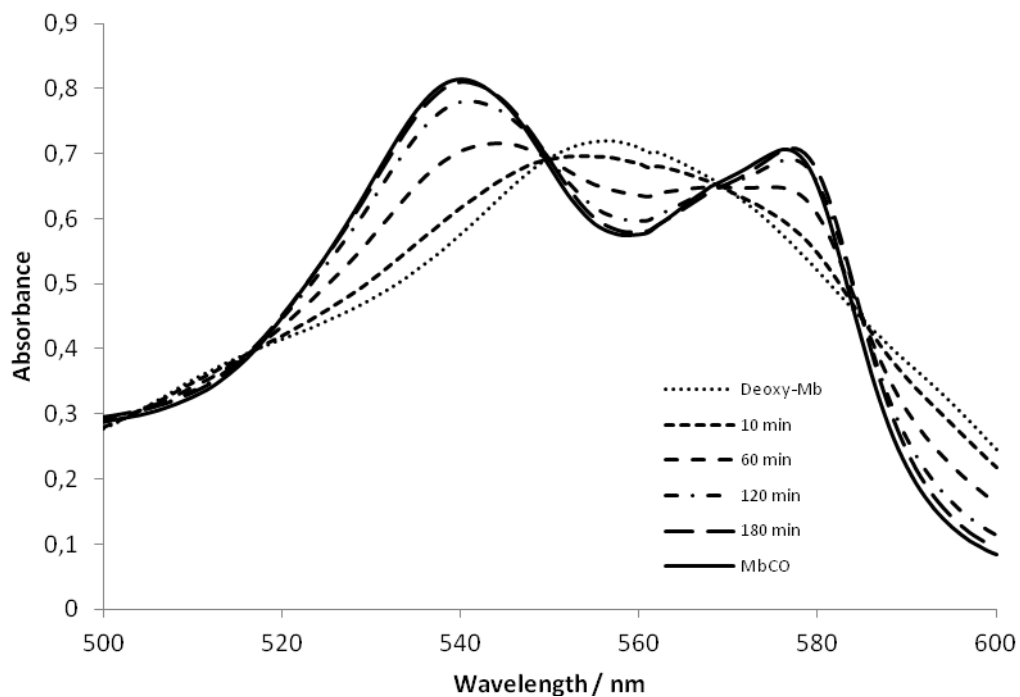

Fig. 1. The changes in the UV-Vis spectrum of myoglobin as CO is released from **1** (60 μM)

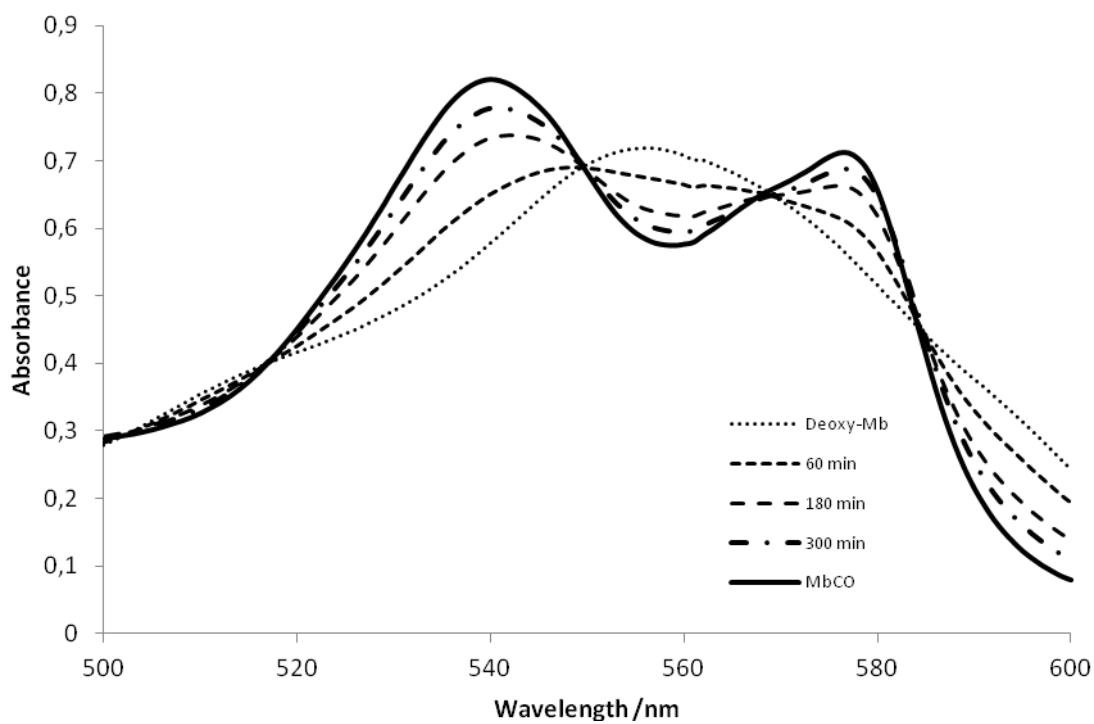

Fig. 2. The changes in the UV-Vis spectrum of myoglobin as CO is released from **1** (40 μM)

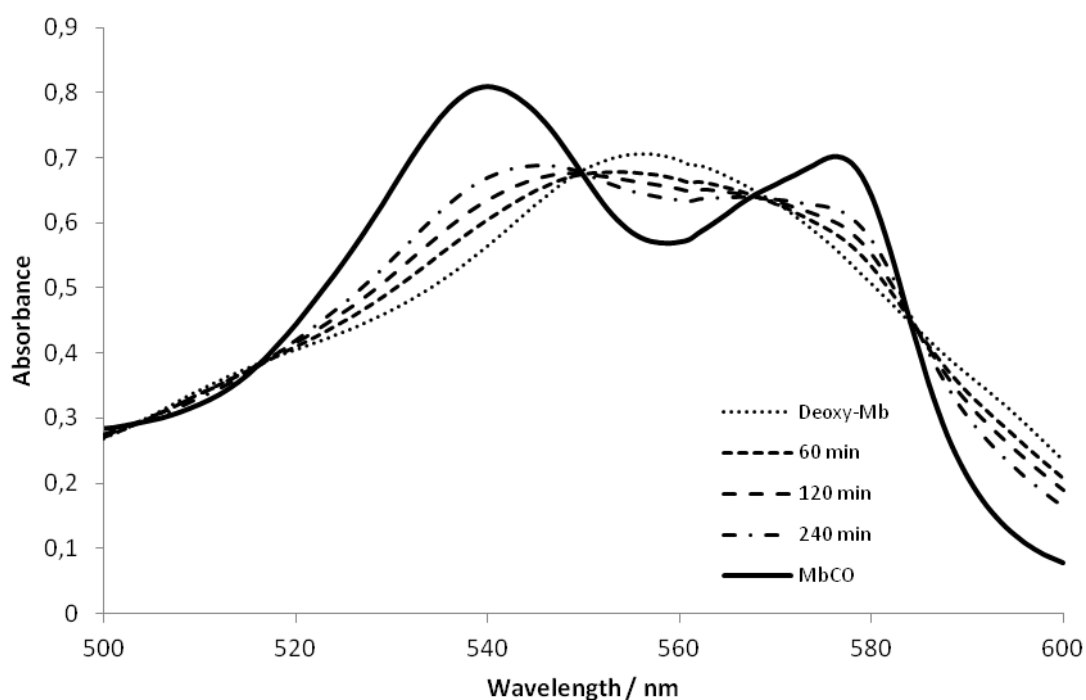

Fig. 3. The changes in the UV-Vis spectrum of myoglobin as CO is released from **1** (20  $\mu\text{M}$ )

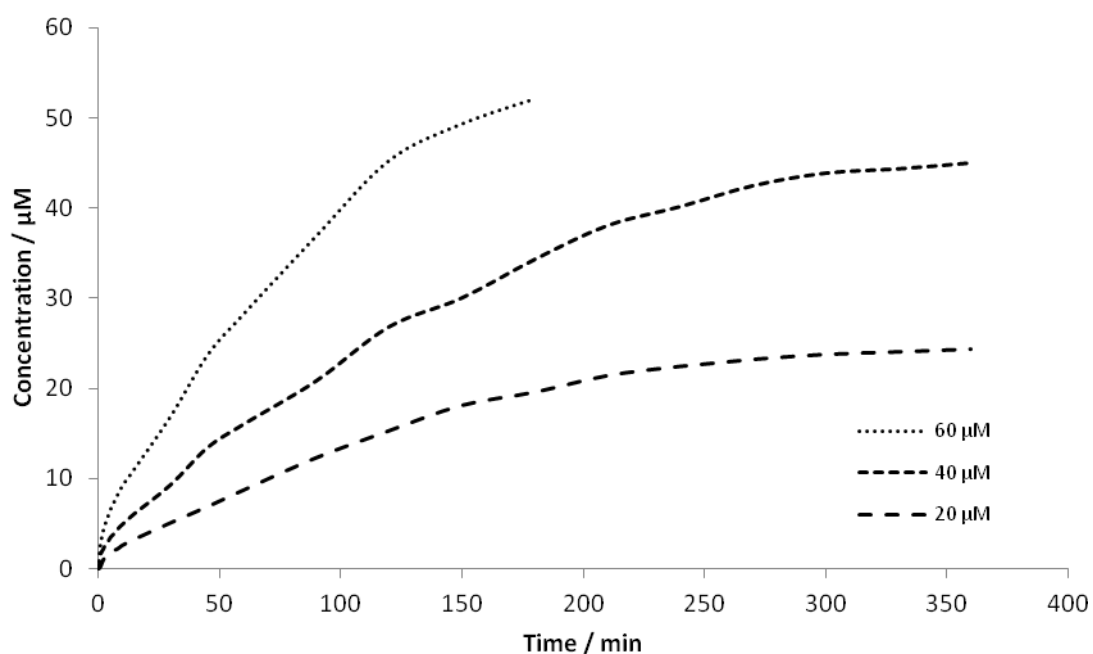

Fig. 4. Formation of MbCO over time after addition of 60  $\mu\text{M}$ , 40  $\mu\text{M}$  and 20  $\mu\text{M}$  of **1** in DMSO to a deoxy-myoglobin solution.

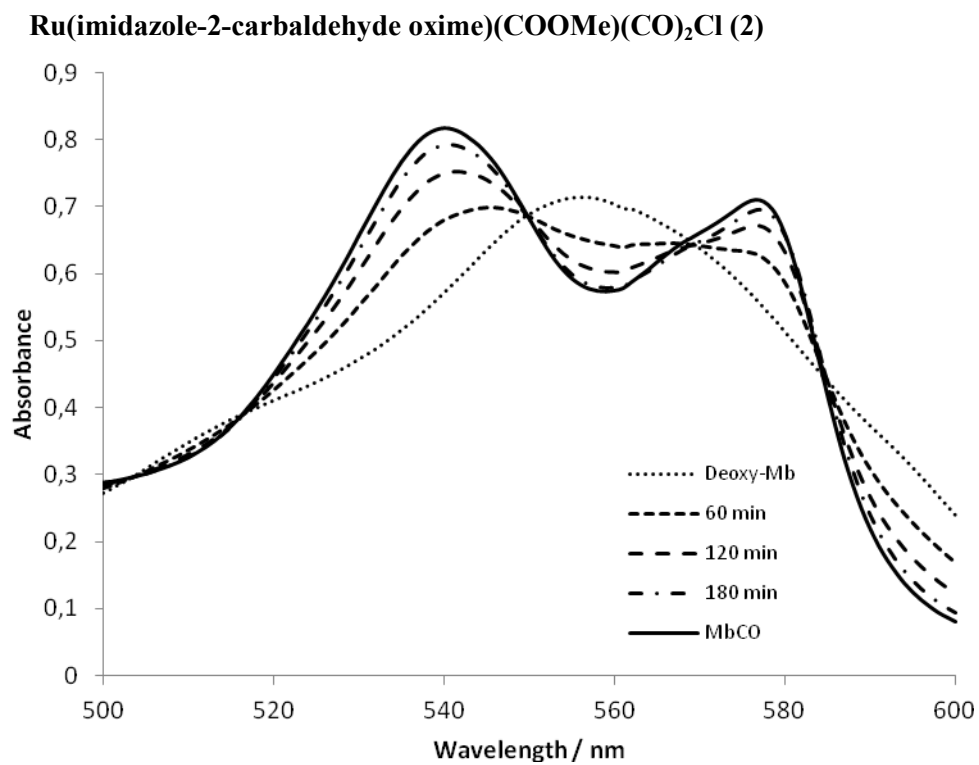

Fig. 5. The changes in the UV-Vis spectrum of myoglobin as CO is released from **2** (60  $\mu$ M)

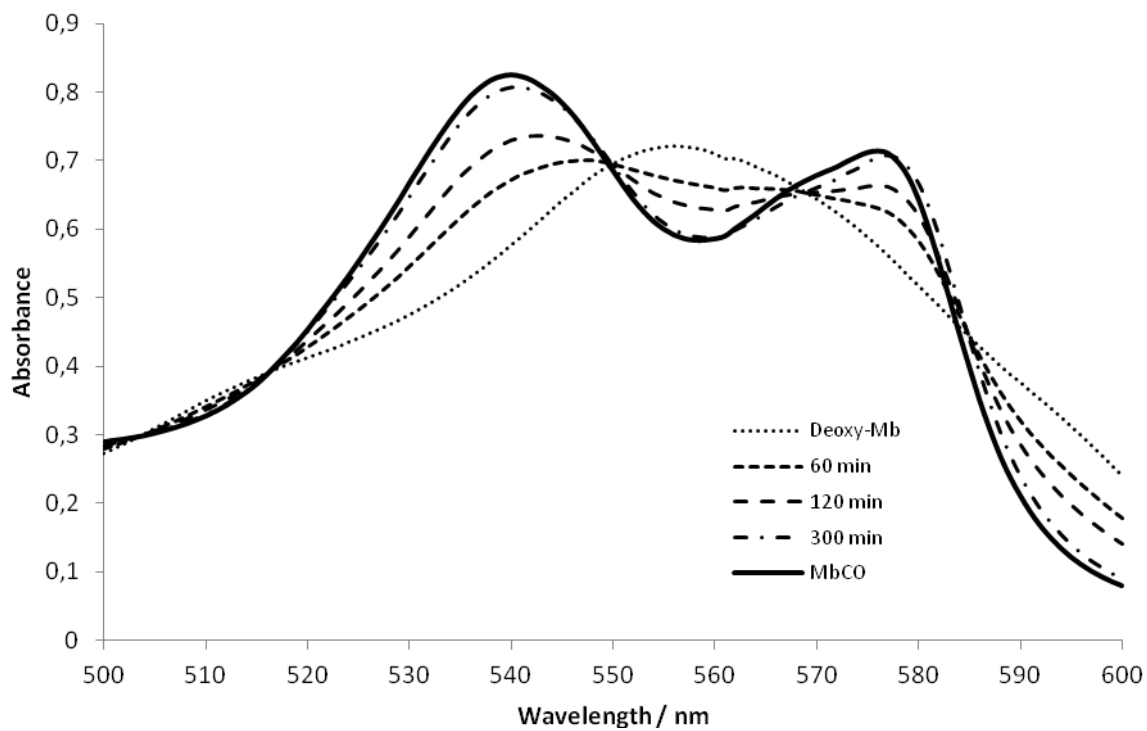

Fig. 6. The changes in the UV-Vis spectrum of myoglobin as CO is released from **2** (40  $\mu$ M)

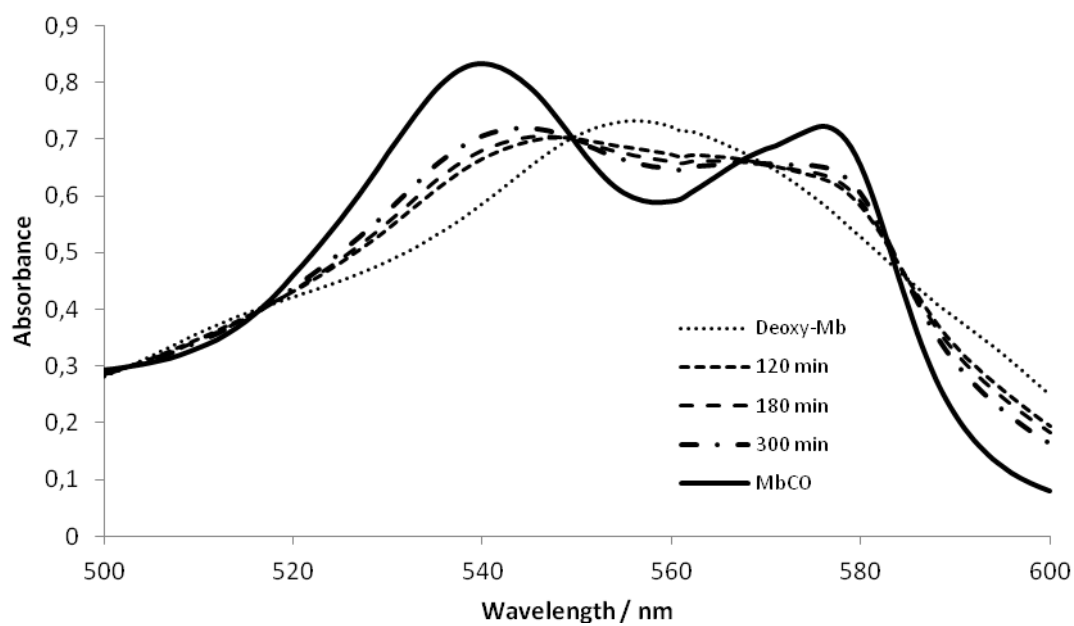

Fig. 7. The changes in the UV-Vis spectrum of myoglobin as CO is released from **2** (20  $\mu\text{M}$ )

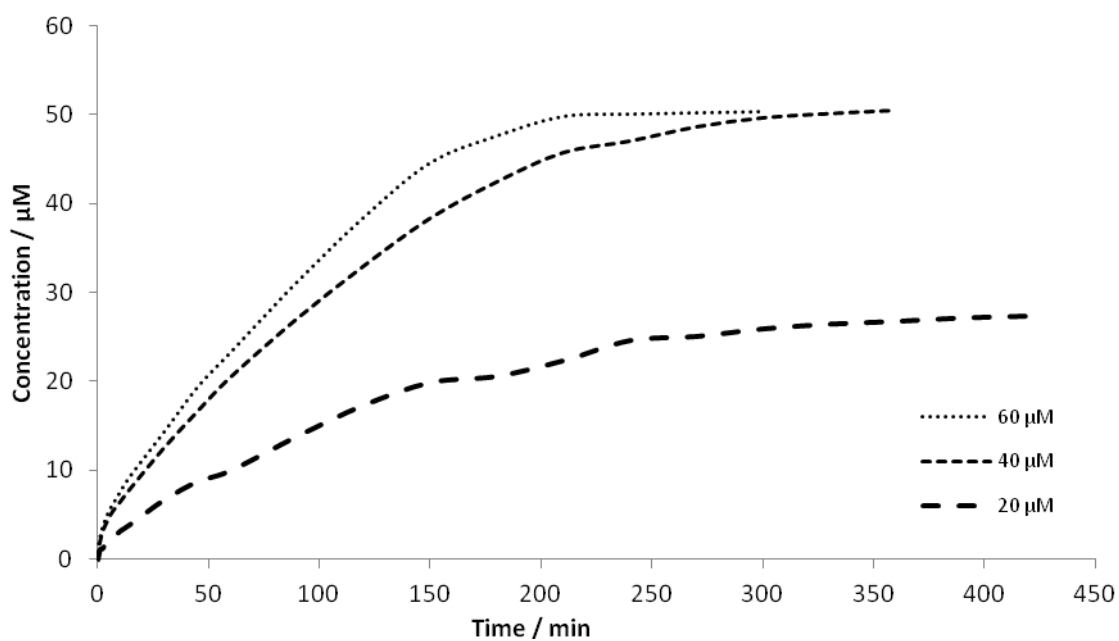

Fig. 8. Formation of MbCO over time after addition of 60  $\mu\text{M}$ , 40  $\mu\text{M}$  and 20  $\mu\text{M}$  of **2** in DMSO to a deoxy-myoglobin solution.

**Ru(1-methylimidazole-2-carbaldehyde oxime)(COOEt)(CO)<sub>2</sub>Cl (3)**

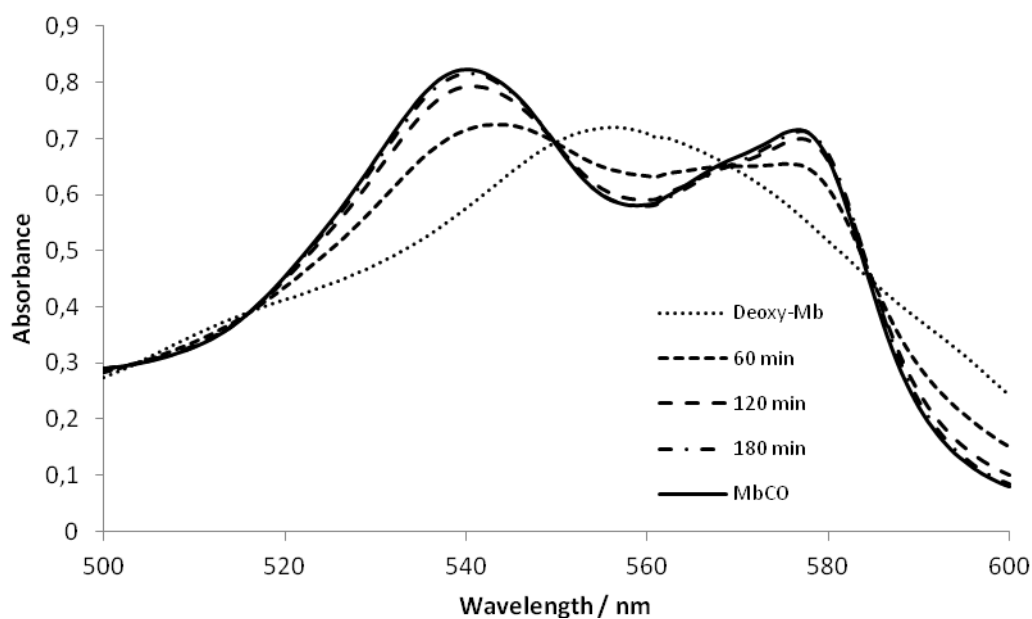

Fig. 9. The changes in the UV-Vis spectrum of myoglobin as CO is released from **3** (60  $\mu$ M)

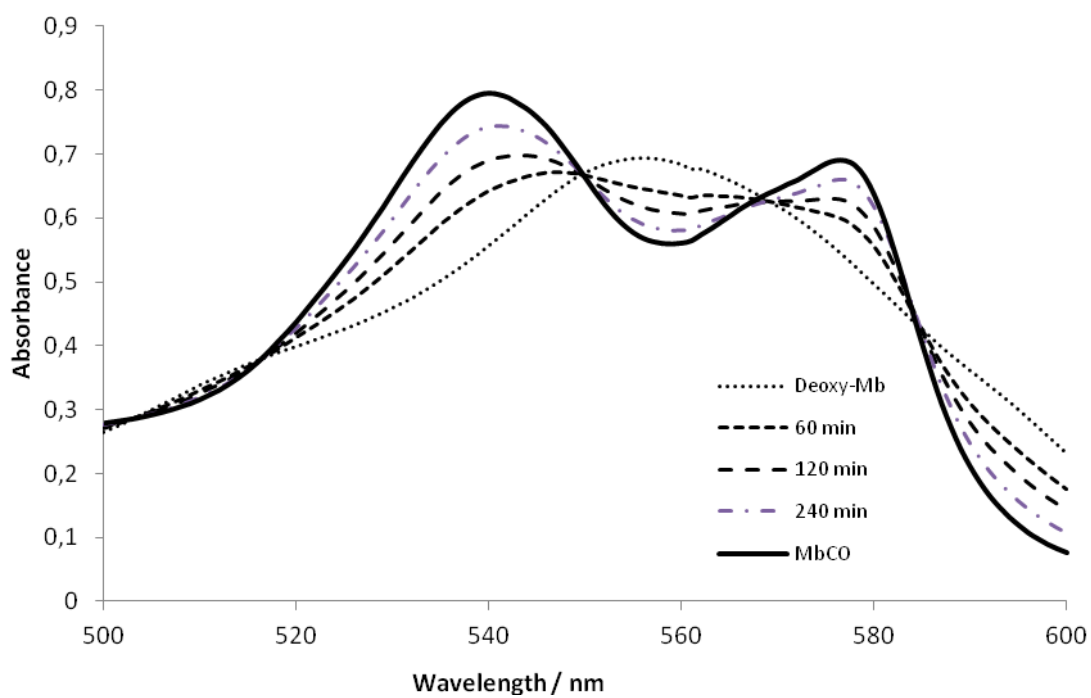

Fig. 10. The changes in the UV-Vis spectrum of myoglobin as CO is released from **3** (40  $\mu$ M)

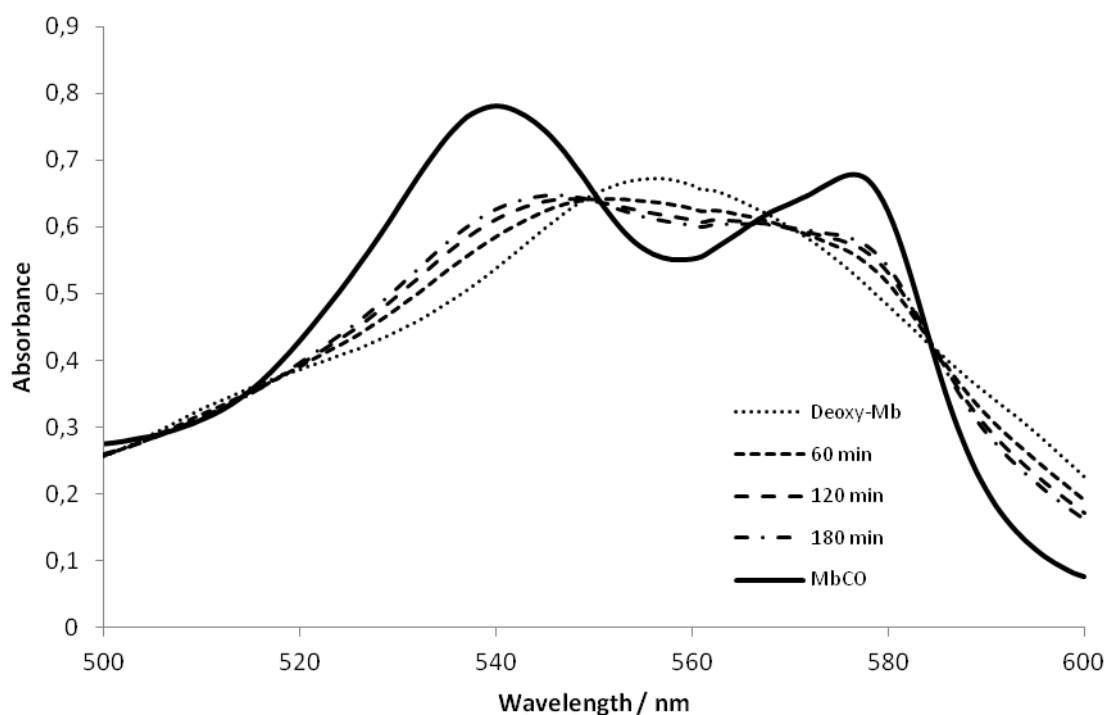

Fig. 11. The changes in the UV-Vis spectrum of myoglobin as CO is released from **3** (20  $\mu\text{M}$ )

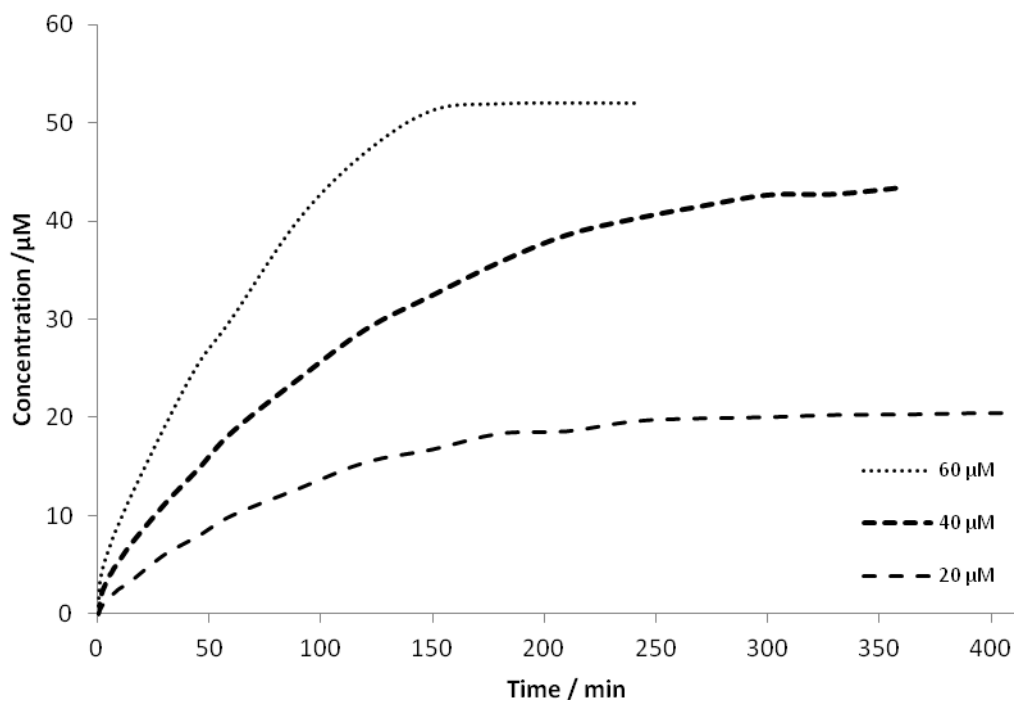

Fig. 12. Formation of MbCO over time after addition of 60  $\mu\text{M}$ , 40  $\mu\text{M}$  and 20  $\mu\text{M}$  of **3** in DMSO to a deoxy-myoglobin solution.

**Ru(1-methylimidazole-2-carbaldehyde oxime)(COOMe)(CO)<sub>2</sub>Cl (4)**

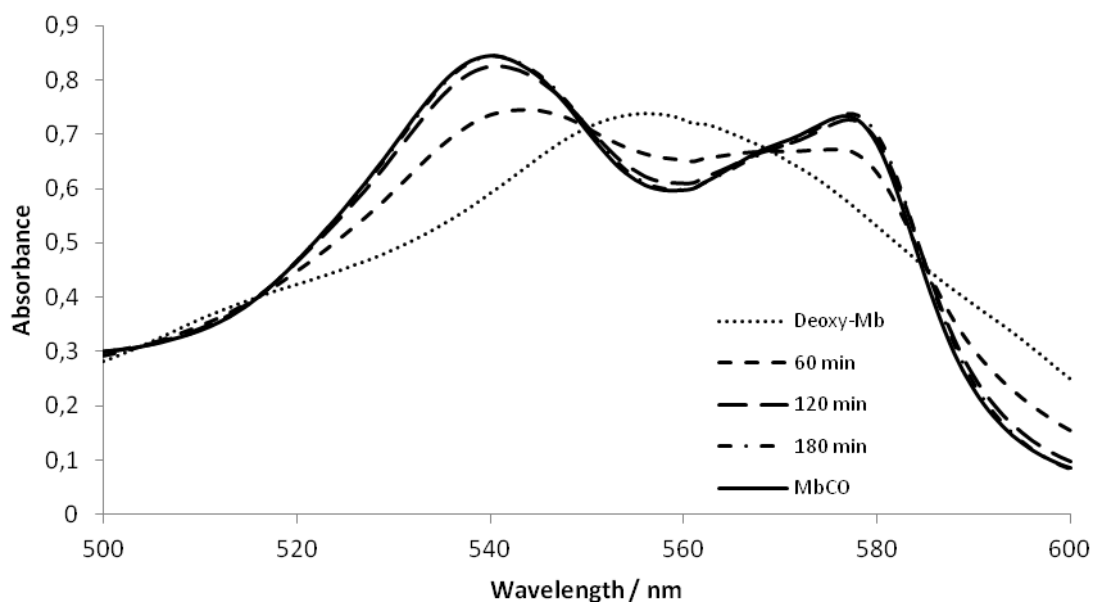

Fig. 13. The changes in the UV-Vis spectrum of myoglobin as CO is released from **4** (60  $\mu$ M)

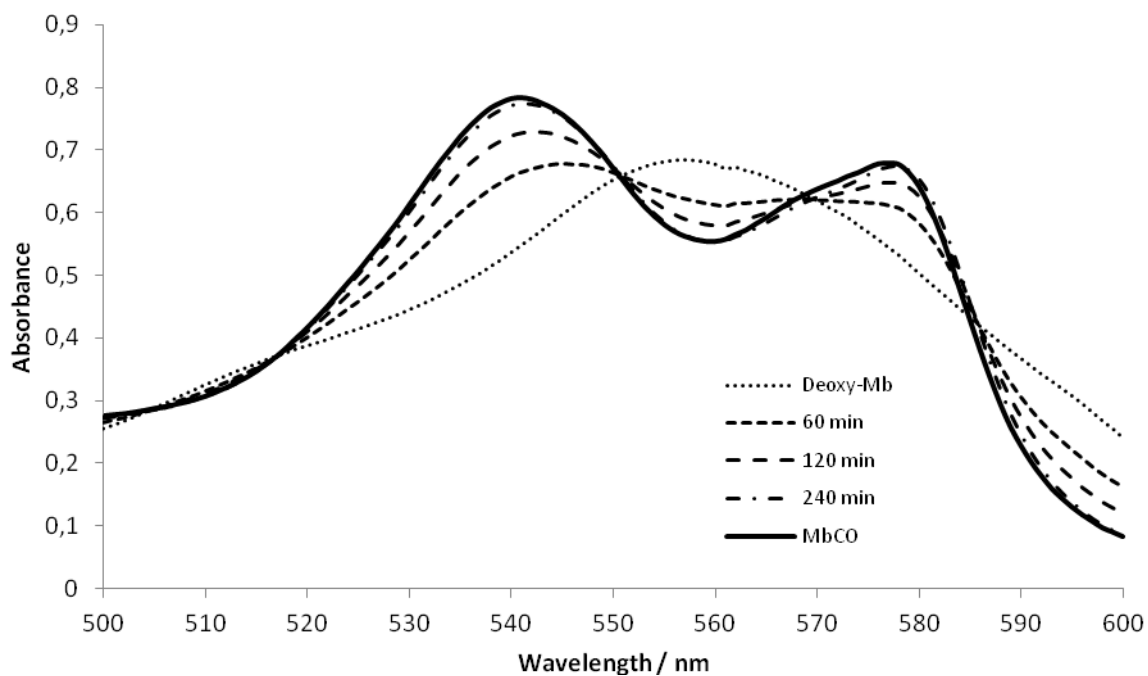

Fig. 14. The changes in the UV-Vis spectrum of myoglobin as CO is released from **4** (40  $\mu$ M)



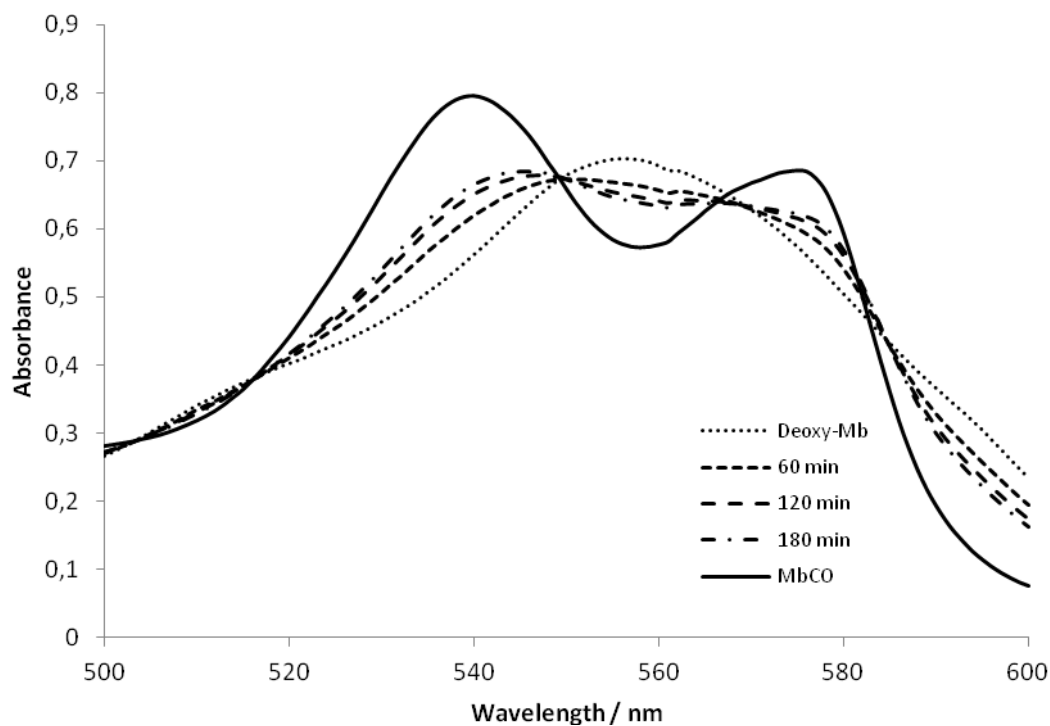

Fig. 15. The changes in the UV-Vis spectrum of myoglobin as CO is released from **4** ( $20\ \mu\text{M}$ )

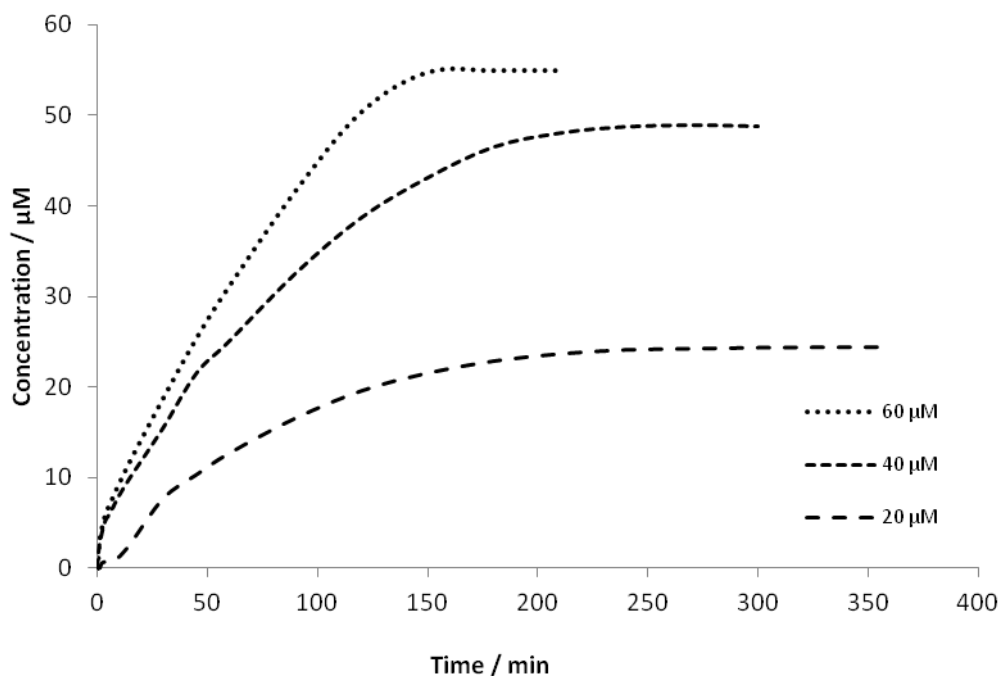

Fig. 16. Formation of MbCO over time after addition of  $60\ \mu\text{M}$ ,  $40\ \mu\text{M}$  and  $20\ \mu\text{M}$  of **4** in DMSO to a deoxy-myoglobin solution.

**Ru(imidazole-4-carbaldehyde oxime)(COOEt)(CO)<sub>2</sub>Cl (**5**)**

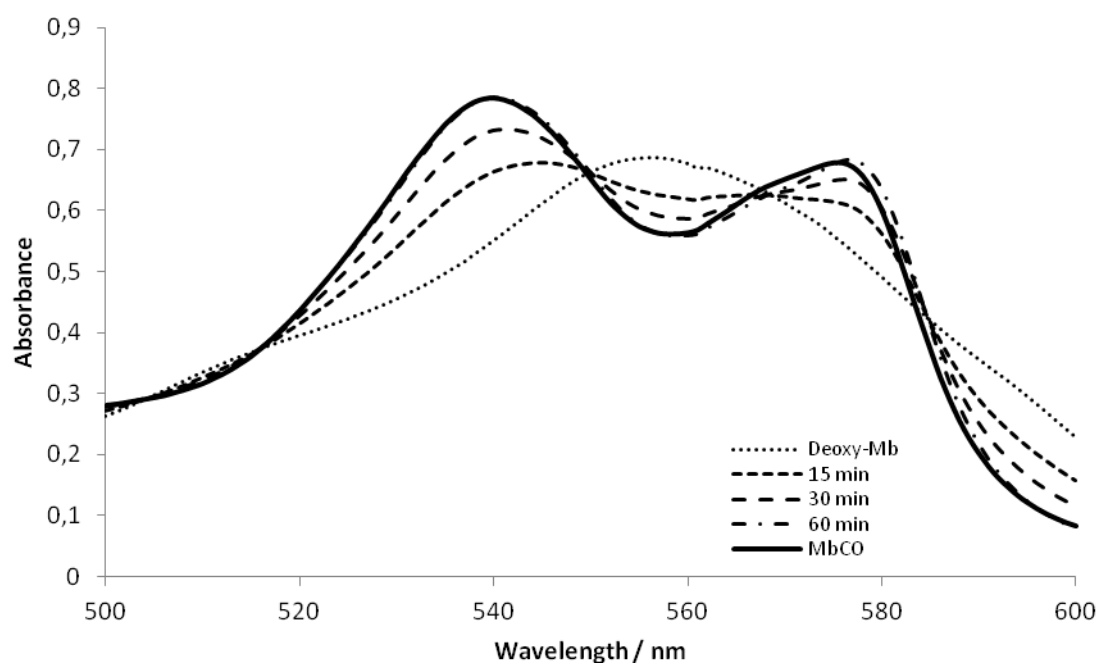

Fig. 17. The changes in the UV-Vis spectrum of myoglobin as CO is released from **5** (60  $\mu$ M)

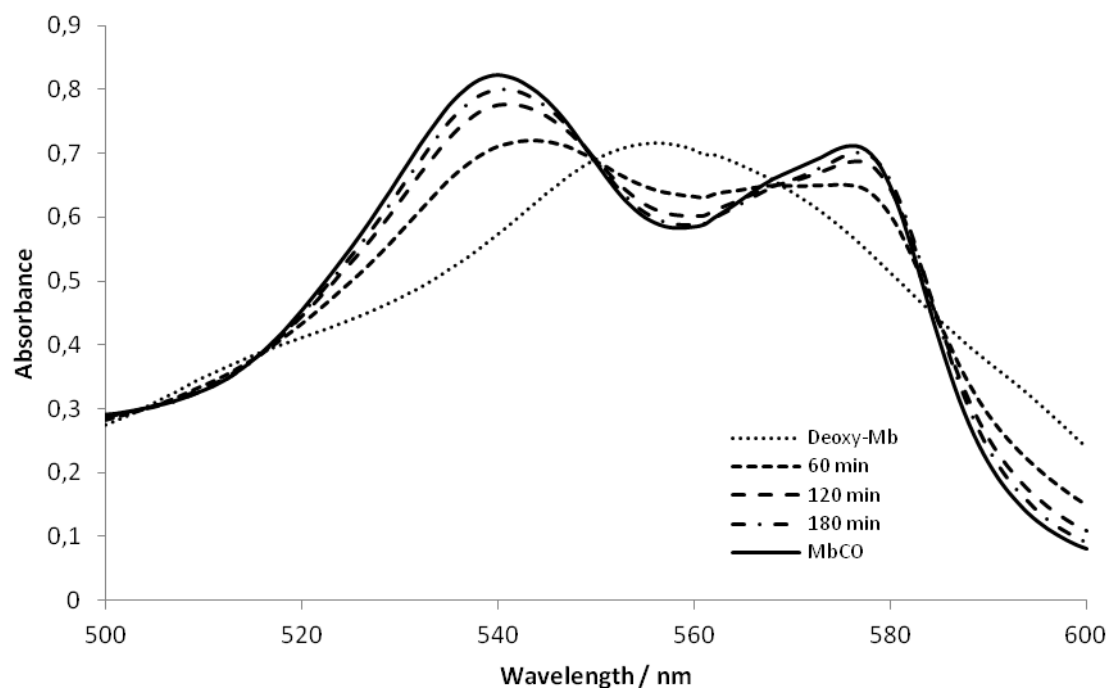

Fig. 18. The changes in the UV-Vis spectrum of myoglobin as CO is released from **5** (40  $\mu$ M)

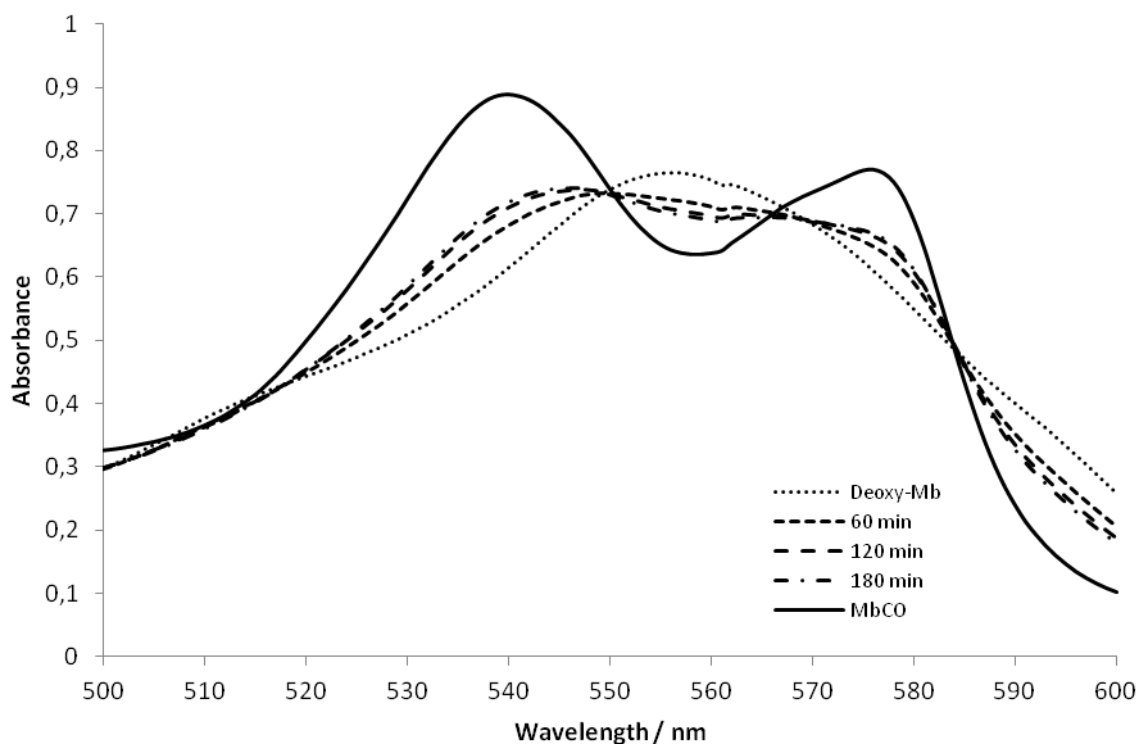

Fig. 19. The changes in the UV-Vis spectrum of myoglobin as CO is released from **5** ( $20 \mu\text{M}$ )

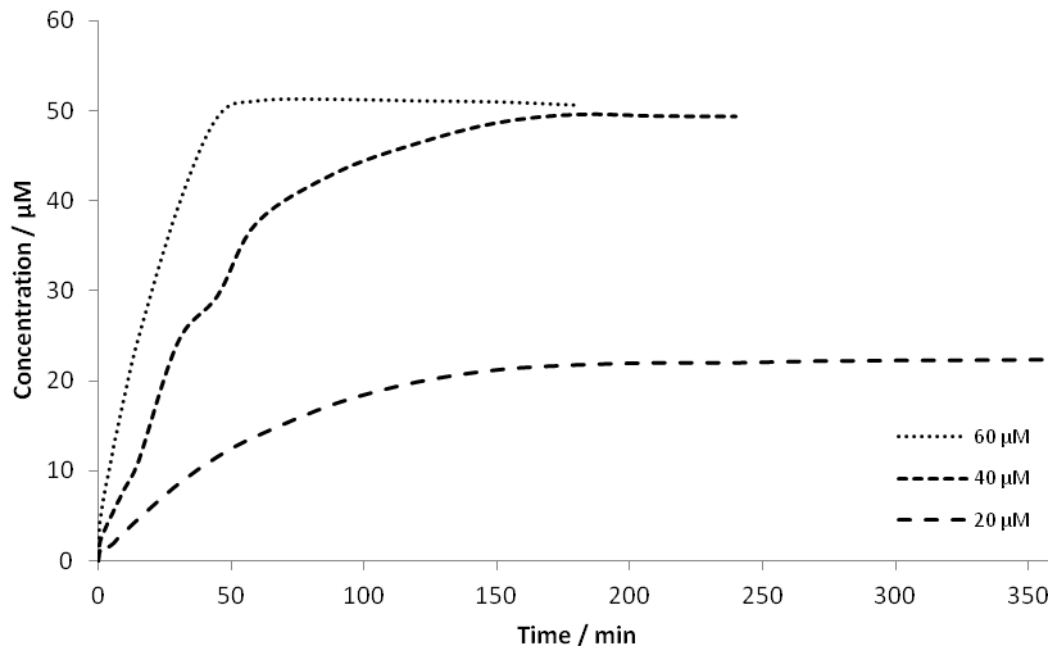

Fig. 20. Formation of MbCO over time after addition of  $60 \mu\text{M}$ ,  $40 \mu\text{M}$  and  $20 \mu\text{M}$  of **5** in DMSO to a deoxy-myoglobin solution.

**Ru(imidazole-4-carbaldehyde oxime)(COOMe)(CO)<sub>2</sub>Cl (6)**

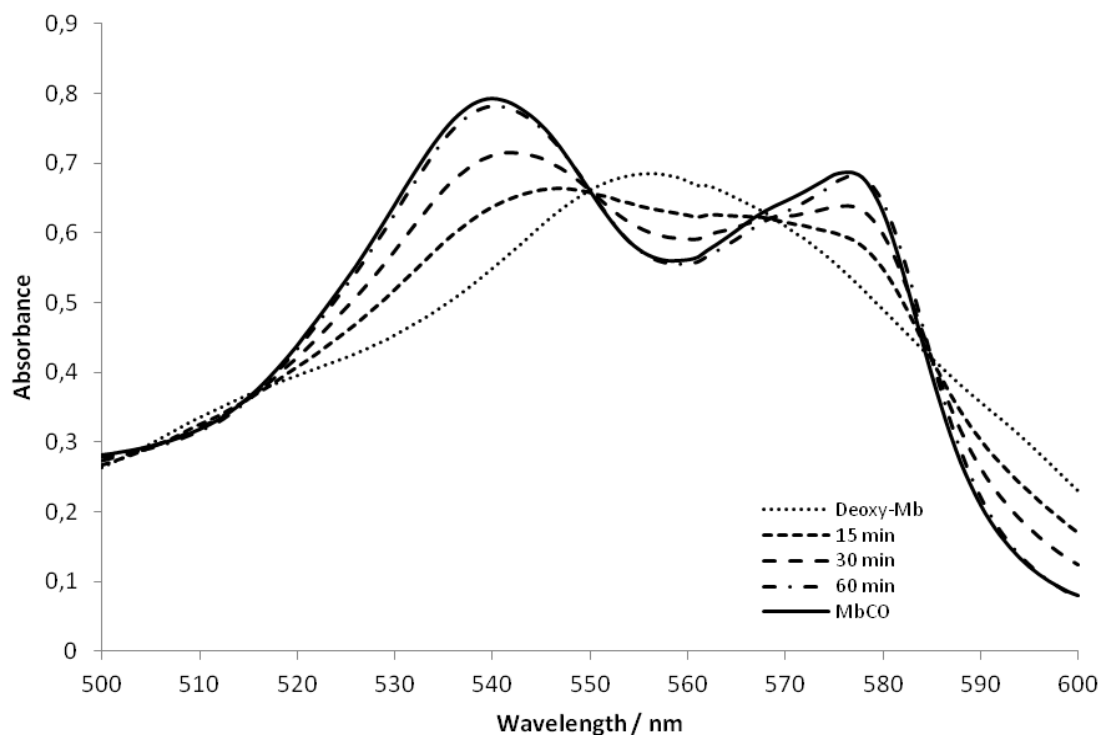

Fig. 21. The changes in the UV-Vis spectrum of myoglobin as CO is released from **6** (60 μM)

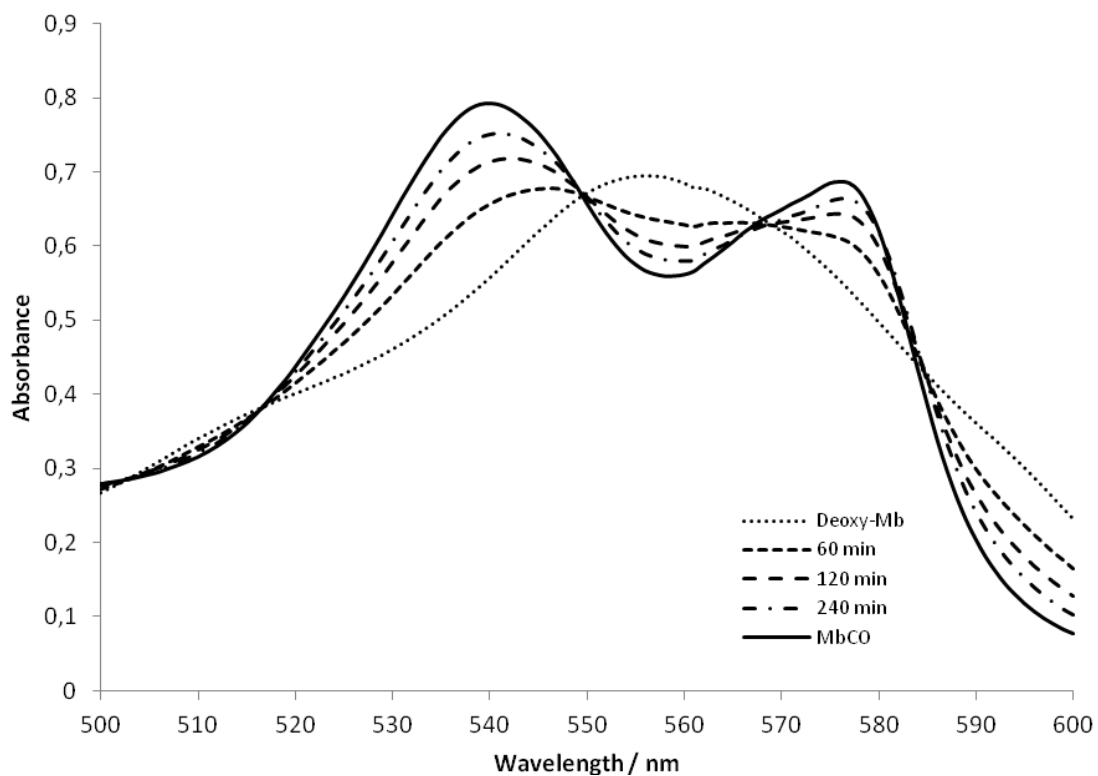

Fig. 22. The changes in the UV-Vis spectrum of myoglobin as CO is released from **6** (40 μM)

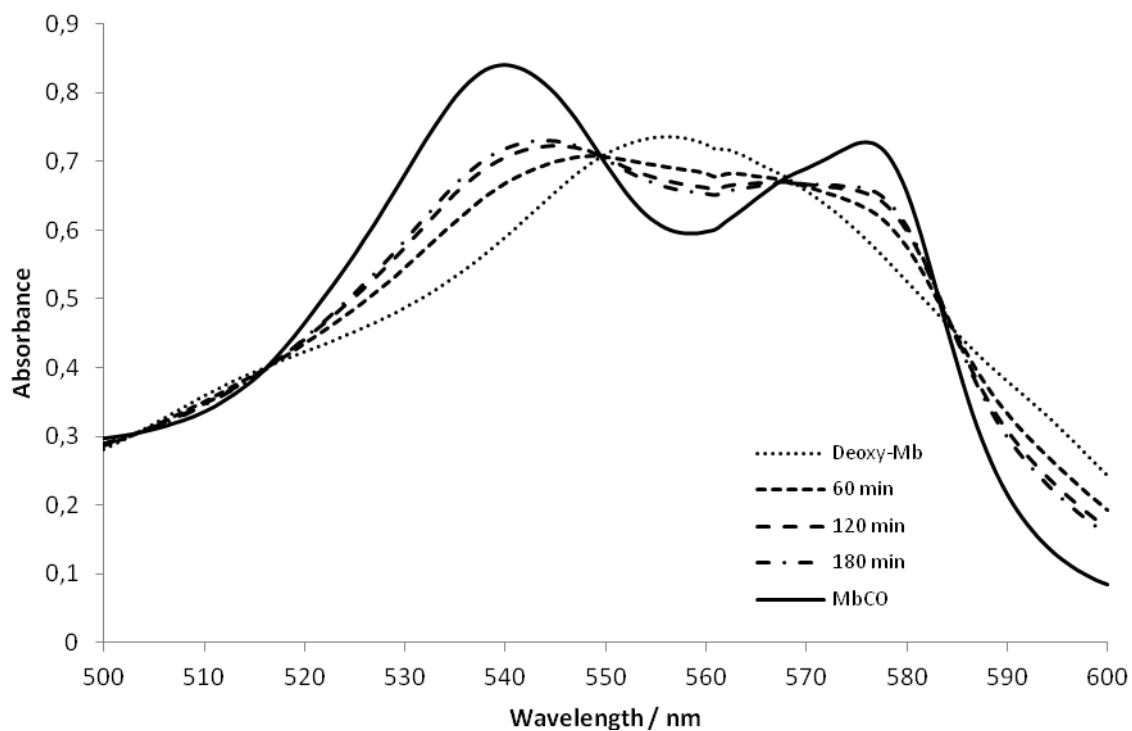

Fig. 23. The changes in the UV-Vis spectrum of myoglobin as CO is released from **6** (20  $\mu\text{M}$ )

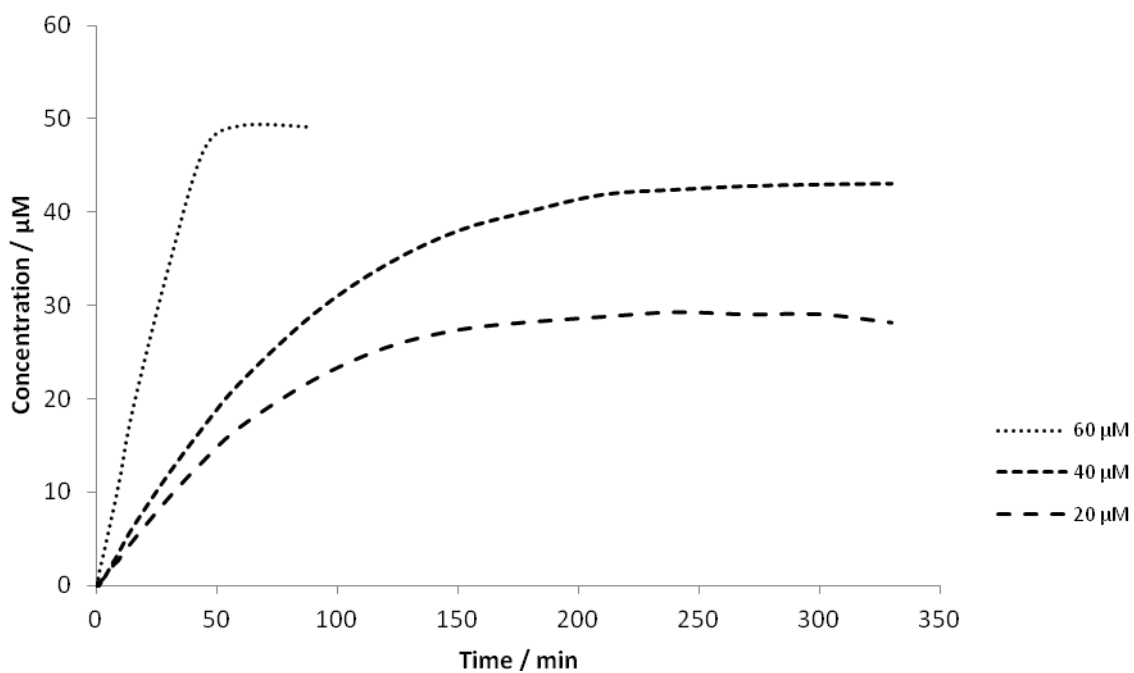

Fig. 24. Formation of MbCO over time after addition of 60  $\mu\text{M}$ , 40  $\mu\text{M}$  and 20  $\mu\text{M}$  of **6** in DMSO to a deoxy-myoglobin solution.
